# Supplementary material
Source: PubMed Central journal article supplement (PMC3710759)
Supplement: mmc1.pdf [file mmc1.pdf]

## Supplemental Data

### *PIK3R1* Mutations Cause Syndromic

### Insulin Resistance with Lipoatrophy

Christel Thauvin-Robinet, Martine Auclair, Laurence Duplomb, Martine Caron-Debarle, Magali Avila, Judith St-Onge, Martine Le Merrer, Bernard Le Luyer, Delphine Héron, Michèle Mathieu-Dramard, Pierre Bitoun, Jean-Michel Petit, Sylvie Odent, Jeanne Amiel, Damien Picot, Virginie Carmignac, Julien Thevenon, Patrick Callier, Martine Laville, Yves Reznik, Cédric Fagour, Marie-Laure Nunes, Jacqueline Capeau, Olivier Lascols, Frédéric Huet, Laurence Faivre, Corinne Vigouroux, and Jean-Baptiste Rivière

**Table S1. Summary of the Trio-Based Exome Sequencing Experiment**

| Family | Individual | Sequencing Output (in Gb) | Mean Sequencing Depth (Median) | Percent Target $\geq 10\times$ | Total Variants <sup>a</sup> | NS/SS/I Variants <sup>a</sup> | Candidate De Novo Events |
|--------|------------|---------------------------|--------------------------------|--------------------------------|-----------------------------|-------------------------------|--------------------------|
| Trio 1 | P1         | 5.1                       | 63 (50)                        | 87.1                           | 36,858                      | 9,580                         | 4                        |
|        | mother     | 4.1                       | 50 (40)                        | 85.0                           | -                           | -                             | -                        |
|        | father     | 5.1                       | 63 (50)                        | 87.2                           | -                           | -                             | -                        |
| Trio 2 | P2         | 4.9                       | 61 (48)                        | 86.8                           | 28,598                      | 9,839                         | 4                        |
|        | mother     | 4.7                       | 60 (48)                        | 86.5                           | -                           | -                             | -                        |
|        | father     | 5.0                       | 63 (49)                        | 87.0                           | -                           | -                             | -                        |

Gb, gigabases; NS/SS/I, nonsynonymous changes, splice-site variants and insertions/deletions.

<sup>a</sup>Variants that passed on the Genome Analysis Toolkit (GATK) hard-filtering parameters used for variant calling. Sequencing depth and coverage metrics were calculated using the GATK Depth of Coverage tool by considering only reads with mapping quality  $\geq 20$  and bases with base quality  $\geq 20$ .[1](#)

**Table S2. Candidate De Novo Events Identified in Subjects 1 and 2 (P1 and P2)**

| Coordinates (hg19) | Alleles (Ref/Alt)  | Gene          | Type of Change | Amino Acid Change | Proband Reads <sup>a</sup> | Father Reads <sup>a</sup> | Mother Reads <sup>a</sup> | Sanger Validation |
|--------------------|--------------------|---------------|----------------|-------------------|----------------------------|---------------------------|---------------------------|-------------------|
| <b>P1</b>          |                    |               |                |                   |                            |                           |                           |                   |
| chr4:3133452       | C/T                | <i>HTT</i>    | missense       | p.Ser729Phe       | 32/64                      | 0/45                      | 0/37                      | not tested        |
| chr4:72120957      | G/A                | <i>SLC4A4</i> | missense       | p.Gly32Arg        | 9/19                       | 0/30                      | 0/18                      | not tested        |
| chr5:67591018      | AATT/A             | <i>PIK3R1</i> | in-frame del   | p.Ile539del       | 14/26                      | 0/18                      | 0/23                      | de novo           |
| chr12:48919883     | C/A                | <i>OR8S1</i>  | missense       | p.Leu157Ile       | 87/249                     | 0/250                     | 2/240                     | not tested        |
| <b>P2</b>          |                    |               |                |                   |                            |                           |                           |                   |
| chr5:60628574      | CCGGCCGCAACCTCGG/C | <i>ZSWIM6</i> | in-frame del   | -                 | 2/10                       | 0/5                       | 0/7                       | not tested        |
| chr5:67590403      | G/A                | <i>PIK3R1</i> | missense       | p.Glu489Lys       | 19/56                      | 1/52                      | 0/44                      | de novo           |
| chr15:65678327     | C/CA               | <i>IGDCC4</i> | frameshift ins | -                 | 3/9                        | 0/8                       | 0/8                       | not tested        |
| chr17:72878822     | C/T                | <i>FADS6</i>  | missense       | p.Ala126Thr       | 13/27                      | 0/36                      | 0/24                      | not tested        |

Ref, reference allele; alt, alternative allele; del, deletion; ins, insertion. <sup>a</sup>The numerator indicates the number of reads supporting the variant; the denominator indicates the total number of reads at the variant site. The nomenclature of *PIK3R1* mutations is based on RefSeq accession number NM\_181523.2. None of the two index individuals had likely disease-causing mutations in *AGPAT2*, *BSCL2*, *LMNA*, *PPARG* or *INSR*.

**Table S3. Main Clinical Features of the 14 Additional Affected Individuals Tested for *PIK3RI* Mutations**

| Individual | Features of the SHORT Acronym |                                                 |                   |                | Other Findings |                    |             |          |                                                                                                            |
|------------|-------------------------------|-------------------------------------------------|-------------------|----------------|----------------|--------------------|-------------|----------|------------------------------------------------------------------------------------------------------------|
|            | Short Stature                 | Hyperextensibility of Joints or Inguinal Hernia | Ocular Depression | Rieger Anomaly | Teeth Delay    | Facial Dysmorphism | Lipoatrophy | Diabetes | Additional Findings                                                                                        |
| P7         | -                             | -                                               | NA                | -              | +              | +                  | +           | +        | astigmatism, brachydactyly, severe insulin resistance, primary amenorrhea due to polycystic ovary syndrome |
| P8         | +                             | -                                               | +                 | -              | NA             | +                  | +           | +        | severe insulin resistance                                                                                  |
| P9         | +                             | -                                               | -                 | -              | NA             | +                  | +           | +        | hemiparesis and intellectual disability secondary to neonatal cerebral hemorrhage                          |
| P10        | +                             | -                                               | -                 | NA             | NA             | +                  | +           | +        | severe insulin resistance, acanthosis nigricans, hirsutism, hypomastia                                     |
| P11        | +                             | -                                               | NA                | NA             | NA             | +                  | +           | +        | severe insulin resistance                                                                                  |
| P12        | +                             | -                                               | -                 | NA             | NA             | +                  | +           | -        | acanthosis nigricans, hypertrophic cardiomyopathy, hepatomegaly                                            |
| P13        | +                             | -                                               | -                 | NA             | +              | +                  | +           | +        | severe insulin resistance, primary amenorrhea                                                              |
| P14        | +                             | -                                               | -                 | NA             | NA             | +                  | +           | +        | acanthosis nigricans, insulin resistance, deafness                                                         |
| P15        | -                             | -                                               | -                 | -              | -              | +                  | +           | -        | congenital bilateral cataract, iris atrophy, hepatomegaly, alopecia, myopathy                              |
| P16        | +                             | -                                               | -                 | NA             | NA             | +                  | +           | +        | severe insulin resistance, liver steatosis, hypertriglyceridemia                                           |
| P17        | +                             | -                                               | -                 | -              | -              | +                  | +           | -        | moderate hyperopia                                                                                         |
| P18        | -                             | -                                               | -                 | +              | -              | +                  | +           | -        | oligodontia                                                                                                |
| P19        | +                             | -                                               | -                 | -              | +              | +                  | +           | -        | aortic valve stenosis, hypospadias, micropenis                                                             |
| P20        | -                             | -                                               | -                 | -              | -              | +                  | +           | +        |                                                                                                            |

NA, not available.

**Table S4. Allele Frequency of the Five *PIK3R1* Mutation Sites Associated with SHORT Syndrome in ~6,500 Individuals from the NHLBI GO Exome Sequencing Project**

| <b>Mutation Coordinates (hg19)</b> | <b>Alleles (Ref/Alt)</b> | <b>cDNA Change</b> | <b>dbSNP ID</b> | <b>European American Allele Count (Alt/Ref)</b> | <b>African American Allele Count (Alt/Ref)</b> | <b>All Allele Count (Alt/Ref)</b> | <b>Average Sample Read Depth</b> |
|------------------------------------|--------------------------|--------------------|-----------------|-------------------------------------------------|------------------------------------------------|-----------------------------------|----------------------------------|
| chr5:67591018                      | AATT/A                   | c.1615_1617delATT  | none            | 0/8600                                          | 0/4406                                         | 0/1306                            | 102                              |
| chr5:67590403                      | G/A                      | c.1465G>A          | none            | 0/8600                                          | 0/4406                                         | 0/1306                            | 66                               |
| chr5:67592129                      | C/T                      | c.1945C>T          | none            | 0/8600                                          | 0/4406                                         | 0/1306                            | 161                              |
| chr5:67592127                      | T/TT                     | c.1943dupT         | none            | 0/8600                                          | 0/4406                                         | 0/1306                            | 162                              |
| chr5:67592076                      | G/A                      | c.1892G>A          | none            | 0/8600                                          | 0/4406                                         | 0/1306                            | 179                              |

Ref, reference allele; alt, alternative allele. The nomenclature of *PIK3R1* mutations is based on RefSeq accession number NM\_181523.2. The NHLBI Exome Sequencing Project (ESP) dataset consists of deep-coverage whole-exome data from ~6,500 subjects (13,000 chromosomes; see Web Resources).

**Table S5. Detailed Endocrine and Biological Data in Eight Individuals with *PIK3R1* Mutations**

|                                               |                                       | Subject         |                 |        |        |       |      |      |      |       |
|-----------------------------------------------|---------------------------------------|-----------------|-----------------|--------|--------|-------|------|------|------|-------|
|                                               |                                       | P1 <sup>a</sup> | P2 <sup>a</sup> | P3     |        | P4    | P5   | P7   | P8   | P9    |
| Age                                           |                                       | 7y 9m           | 7y 8m           | 11y 6m | 13y 6m | 20m   | 40y  | 28y  | 60y  | 28y   |
| Glycated hemoglobin (N = 4.0–6.0%)            |                                       | 5.4             | 5.2             | 7.3    | 7.7    | NA    | 9.0  | 6.8  | 8.0  | 6.1   |
| Serum IgF1 (N = 57–316ng/ml)                  |                                       | 296             | NA              | NA     | NA     | NA    | NA   | 285  | NA   | NA    |
| Oral glucose tolerance test                   |                                       |                 |                 |        |        |       |      |      |      |       |
| T0                                            | Blood glucose level (N < 6.1 mmol/l)  | 4.49            | 5.06            | 4.9    | 10.5   | NA    | 11.6 | 8.6  | 12.0 | 6.1   |
|                                               | Serum insulin (N < 20 mUI/l)          | 38.3            | 52.0            | 69     | 56     | NA    | NA   | 12   | 76   | 23    |
|                                               | Peptide C (0.5–3.0 ng/ml)             | 4.9             | 7.0             | NA     | NA     | NA    | NA   | 2.7  | 13.3 | 8.5   |
| T30                                           | Blood glucose level (mmol/l)          | 8.78            | 9.02            | 8.5    | 16.9   | NA    | NA   | 17   | NA   | NA    |
|                                               | Serum insulin (mUI/l)                 | 284.0           | 929.0           | >300   | 82.7   | NA    | NA   | 37   | NA   | NA    |
|                                               | Peptide C (ng/ml)                     | 20.2            | 45.8            | NA     | NA     | NA    | NA   | 5.2  | NA   | NA    |
| T60                                           | Blood glucose level (N < 11.1 mmol/l) | 6.34            | NA <sup>b</sup> | 7.1    | 21     | NA    | NA   | 21   | NA   | NA    |
|                                               | Serum insulin (mUI/l)                 | 211.0           | NA <sup>b</sup> | >300   | 169    | NA    | NA   | 40   | NA   | NA    |
|                                               | Peptide C (ng/ml)                     | 15.3            | NA <sup>b</sup> | NA     | NA     | NA    | NA   | 7.8  | NA   | NA    |
| T120                                          | Blood glucose level (N < 7.8 mmol/l)  | 6.55            | 6.6             | 6.9    | 18.5   | NA    | NA   | 24   | NA   | NA    |
|                                               | Serum insulin (mUI/l)                 | 228.0           | 240.0           | >300   | 146    | NA    | NA   | 76   | NA   | NA    |
|                                               | Peptide C (ng/ml)                     | 16.3            | 17.2            | NA     | NA     | NA    | NA   | 10.6 | NA   | NA    |
| T180                                          | Blood glucose level (mmol/l)          | 5.87            | 3.68            | 5.3    | 12.4   | NA    | NA   | 23   | NA   | NA    |
|                                               | Serum insulin (mUI/l)                 | 98.8            | 53.8            | 207    | 76.9   | NA    | NA   | 158  | NA   | NA    |
|                                               | Peptide C (ng/ml)                     | 14.5            | 5.1             | NA     | NA     | NA    | NA   | 15.5 | NA   | NA    |
| Serum triglycerides (N = <1.7mmol/l)          |                                       | 0.44            | 0.55            | 1.32   | NA     | 0.68  | 0.66 | 1.98 | 2.10 | 1.99  |
| Serum total cholesterol (N = 3.10–5.20mmol/l) |                                       | 3.03            | 3.70            | 3.82   | NA     | 4.69  | 3.77 | 4.43 | 4.13 | 7.4   |
| HDL-cholesterol (N = 0.90–1.60mmol/l)         |                                       | 1.25            | 1.62            | NA     | NA     | 1.22  | 1.11 | 0.88 | 0.93 | 1.54  |
| Leptin (N = 0.80–3.20ng/ml))                  |                                       | 1.41            | <1.00           | NA     | NA     | NA    | NA   | NA   | NA   | <1.00 |
| Adiponectin (N = 3.8–11.8µg/ml )              |                                       | 11.0            | NA              | NA     | NA     | NA    | NA   | NA   | NA   | 9.13  |
| Serum IgA level (N = 0.56–1.38g/l)            |                                       | 0.85            | 0.65            | NA     | NA     | <0.26 | NA   | NA   | NA   | NA    |
| Serum IgG level (N = 6.8–10.2g/l)             |                                       | 6.6             | 7.1             | NA     | NA     | 10.7  | NA   | NA   | NA   | NA    |
| Blood calcium (N = 2.12–2.52 mmol/l)          |                                       | 2.13            | 2.38            | 2.48   | NA     | 2.5   | 2.42 | 2.19 | 2.34 | 2.47  |

Y, year; m, month; NA, not available.

<sup>a</sup>These subjects were under growth hormone treatment during the course of the evaluation.

<sup>b</sup>Not available because of hemolysis.

## Reference

1. McKenna, A., Hanna, M., Banks, E., Sivachenko, A., Cibulskis, K., Kernytsky, A., Garimella, K., Altshuler, D., Gabriel, S., Daly, M., et al. (2010). The Genome Analysis Toolkit: a MapReduce framework for analyzing next-generation DNA sequencing data. *Genome Res.* *20*, 1297-1303.
